# Supplementary material for: A zeolite-based ship-in-a-bottle route to ultrasmall carbon dots for live cell labeling and bioimaging
Source: Royal Society of Chemistry journal article supplement (doi:10.1039/d0na00664e), 2020-01-01
Supplement: d0na00664e1.pdf [file d0na00664e1.pdf]

## Supplementary information

Lei Dong,<sup>†a</sup> Dehong Hu,<sup>†b</sup> Yanding Wang,<sup>a</sup> Zonghai Sheng,<sup>b</sup> Mei Hong,<sup>\*a</sup> Shihe Yang<sup>\*a</sup>

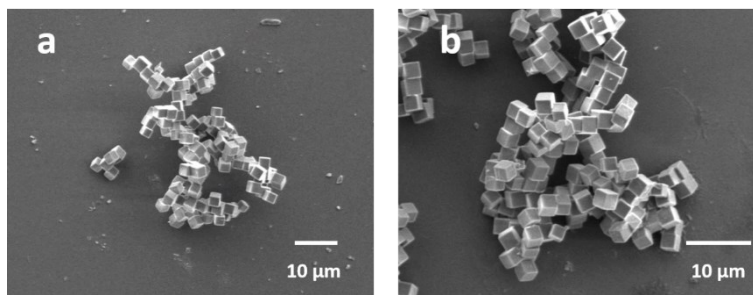

**Fig. S1.** SEM images of the calcined SAPO-20 zeolites synthesized in the presence of pyrrolidine and TEAOH, which were calcined at (a) 600°C and (b) 800°C respectively.

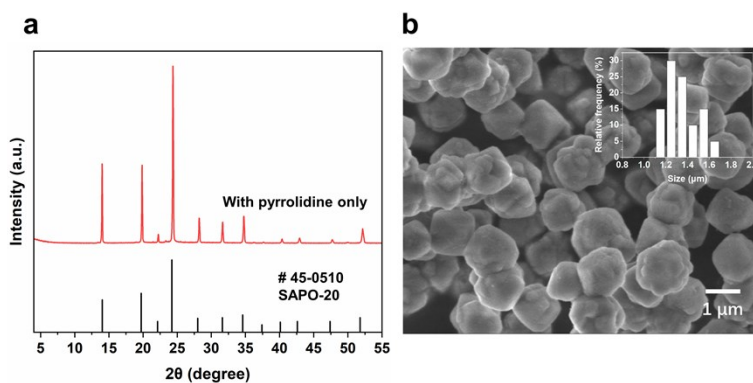

**Fig. S2.** (a) Powder XRD patterns of the washed and calcined SAPO-20 synthesized in the presence of pyrrolidine as referenced to simulated (lower) pattern. (b) SEM image of the as-synthesized SAPO-20, inset is the particle size distribution of the as-synthesized SAPO-20.

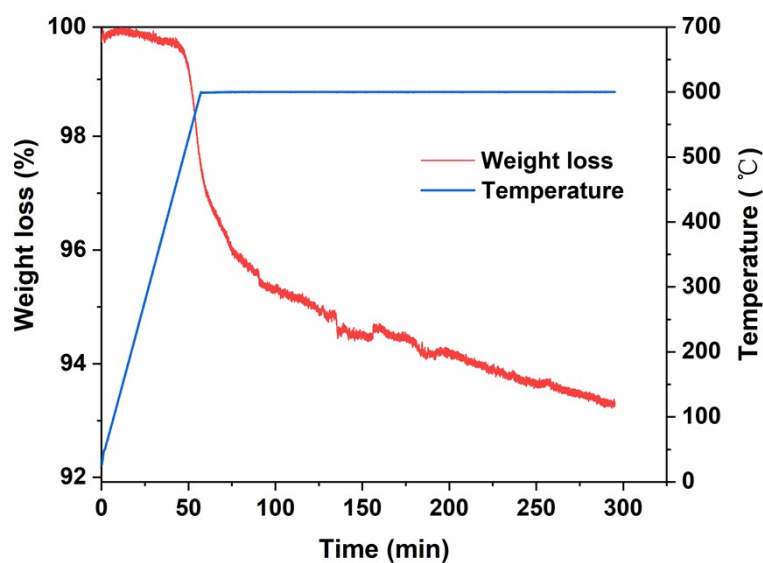

**Fig. S3.** The TGA curve of as-synthesized SAPO-20.

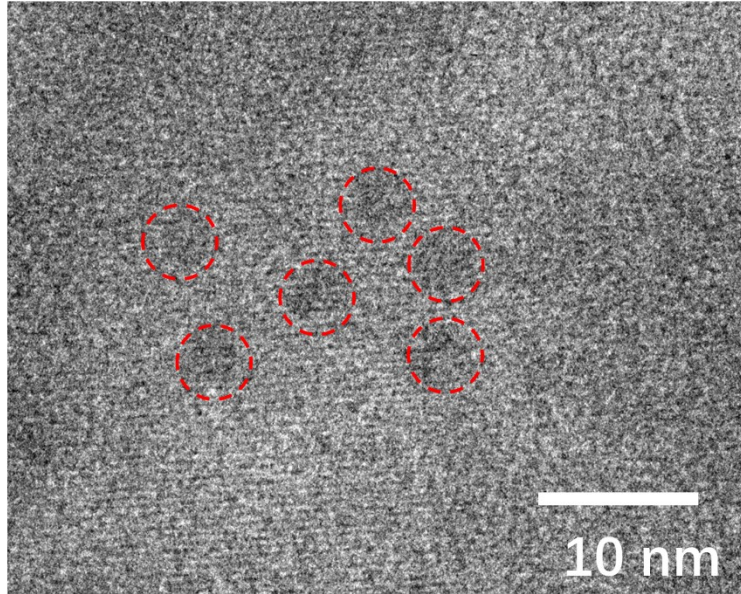

**Fig. S4.** TEM images of the CQDs entrapped in the SAPO-20 framework after calcination.

**Table S1** Comparison of the sizes of carbon dots prepared by zeolite-confined in-situ pyrolysis of organic templates.

| Zeolite framework               | Organic template                             | Carbon dot size (nm)              | Fluorescence properties |               | Reference |
|---------------------------------|----------------------------------------------|-----------------------------------|-------------------------|---------------|-----------|
|                                 |                                              |                                   | Excitation (nm)         | Emission (nm) |           |
| SAPO-46 (AFS) <sup>1</sup>      | dipropylamine                                | 1.5–4                             | N.A.                    | N.A.          | [1]       |
| silicalite-1 (MFI) <sup>2</sup> | tetrapropyl ammonium hydroxide               | 4                                 | 368                     | 450           | [2]       |
| LEV zeotype <sup>3</sup>        | N-methylpiperidine                           | 3.1–3.2                           | 360                     | 460           | [3]       |
| MgAPO-44 (CHA) <sup>4</sup>     | N-methylpiperidine                           | 3.4                               | 360                     | 430           | [4]       |
| AIPO-5 (AFI) <sup>5</sup>       | triethylene glycol (TEG)                     | 3.7                               | 370                     | 430           | [5]       |
| MgAPO-44 (CHA) <sup>6</sup>     | N-methylpiperazine (NMP)                     | 2.5                               | 380                     | 460           | [6]       |
| JU92-300 <sup>7</sup>           | N-methylpiperazine (NMP)                     | 3–4                               | 365                     | 492           | [7]       |
| SAPO-20 (SOD)                   | pyrrolidine and tetraethylammonium hydroxide | 1.53 ± 0.42 with size range 0.7-3 | 470                     | 523           | This work |

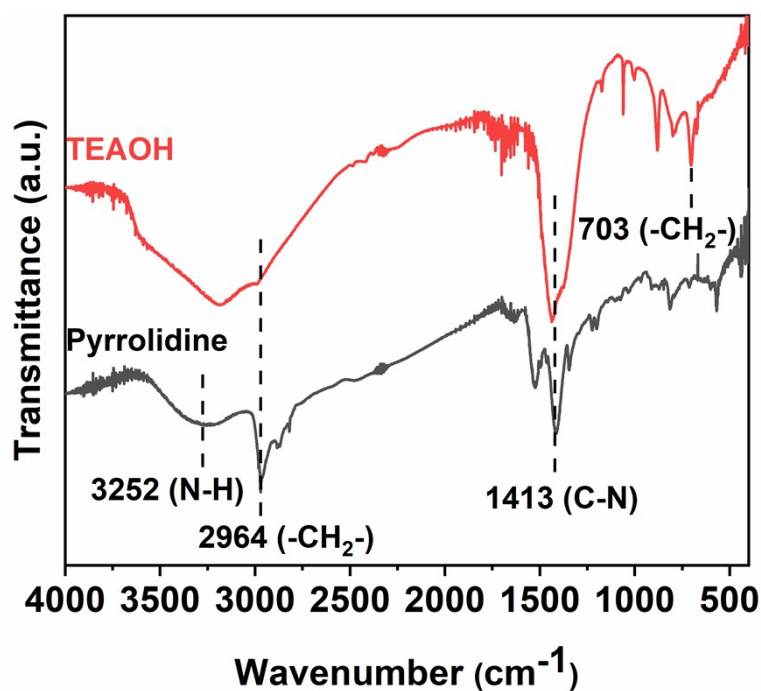

Fig. S5 The FTIR spectra of Pyrrolidine and TEAOH.

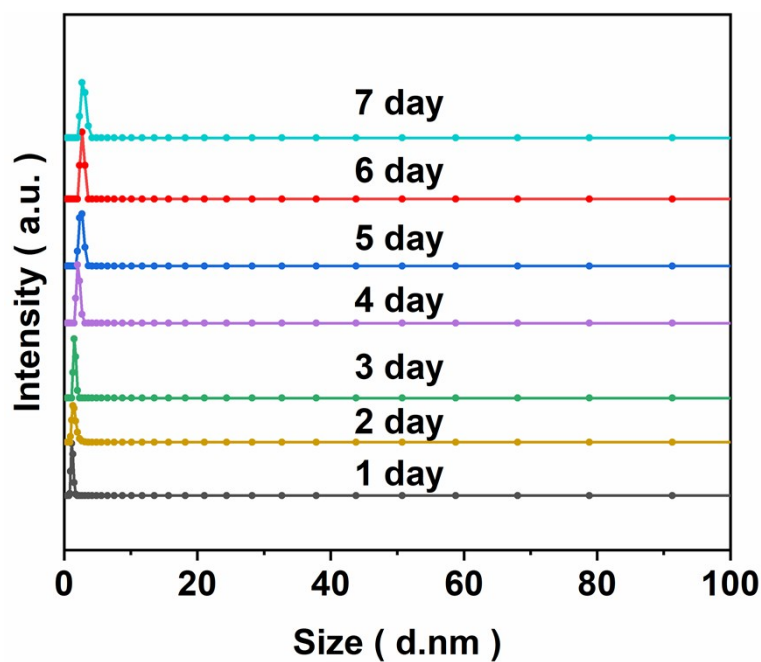

Fig. S6 Comparative particle size distribution curves measured by DLS characterization of CQDs in PBS solution simulating the physiological environment for consecutive 7 days.

## References

- 1 X. Xu, J. Chen, W. Shi, D. Sun, S. Chu, L. Sun, J. Zhai, J. Pei, L. Wang and S. Ruan, *J. Alloys Compd.*, 2019, **782**, 837-844.
- 2 Q.-Y. Yu, G.-Y. Zhai, T.-L. Cui, H. Su, Z.-H. Xue, J.-J. Zhang, P. J. Pauzauskis, S.-i. Hirano, X.-H. Li and J.-S. Chen, *Sci. China Chem.*, 2019, **62**, 434-439.
- 3 B. Wang, Y. Mu, H. Zhang, H. Shi, G. Chen, Y. Yu, Z. Yang, J. Li and J. Yu, *ACS Cent. Sci.*, 2019, **5**, 349-356.
- 4 B. L. Wang, Y. Mu, C. H. Zhang and J. Y. Li, *Sensor Actuat B-Chem*, 2017, **253**, 911-917.
- 5 J. Liu, N. Wang, Y. Yu, Y. Yan, H. Zhang, J. Li and J. Yu, *Sci. Adv.*, 2017, **3**, e1603171.

- 6 Y. Mu, N. Wang, Z. Sun, J. Wang, J. Li and J. Yu, *Chem. Sci.*, 2016, **7**, 3564-3568.
- 7 Y. Wang, Y. Li, Y. Yan, J. Xu, B. Guan, Q. Wang, J. Li and J. Yu, *Chem. Commun.*, 2013, **49**, 9006-9008.
